# Supplementary material for: Deficiency and Also Transgenic Overexpression of Timp-3 Both Lead to Compromised Bone Mass and Architecture In Vivo
Source: PLoS One. 2016 Aug 12;11(8):e0159657. doi: 10.1371/journal.pone.0159657 (PMC4982603; doi:10.1371/journal.pone.0159657)
Supplement: S2 Table — Craniometric measurements of WTB6, Timp-3 KO, WTF1 and Timp-3 Tg skull at 8 weeks of age. (XLSX) [file pone.0159657.s008.xlsx]

## Sheet: Sheet1
Craniometric Measurements				TIMP3_KO_1	TIMP3_KO_2	TIMP3_KO_3	TIMP3_KO_4	TIMP3_KO_5	TIMP3_KO_6		TIMP3_Tg_1	TIMP3_Tg_2	TIMP3_Tg_3	TIMP3_Tg_4	TIMP3_Tg_5	TIMP3_Tg_6		TIMP3_WTB6_1	TIMP3_WTB6_2	TIMP3_WTB6_3	TIMP3_WTB6_4	TIMP3_WTB6_5			TIMP3_WTF1_1	TIMP3_WT_F1_2	TIMP3_WT_F1_3	TIMP3_WT_F1_4	TIMP3_WT_F1_5
(mm)
Inter-nasal distance				3.349	3.388	3.35	3.615	3.476	3.348		3.595	3.429	3.533	3.628	3.337	3.44		3.368	3.29	3.279	3.288	3.361			3.153	3.547	3.348	3.307	3.127
Inter-orbitary length				4.977	4.984	4.958	5.231	5.254	5.167		5.342	5.202	5.067	5.295	4.942	5.238		5.128	5.287	5.23	5.163	5.222			4.91	5.16	4.871	4.933	4.614
Bi-temporal distance				8.612	8.395	8.812	8.654	8.048	8.47		8.797	8.286	8.588	8.923	8.43	8.607		8.654	8.693	8.772	8.838	8.986			8.574	8.056	8.693	9.001	8.421
Nasal length				4.897	5.238	4.56	5.262	5.667	5.568		4.881	5.873	5.333	5.512	5.179	5.78		5.333	5.568	5.523	5.389	5.095			5	6.023	5.673	6.213	5.38
Nasal area				8.839	9.834	7.939	9.6	10.891	11.211		8.17	11.399	9.036	9.771	9.08	11.18		9.395	10.059	9.844	9.334	8.144			8.755	11.738	10.57	12.411	9.924
Frontal length				7.37	6.874	6.504	6.85	7.075	7.37		6.248	7.37	6.437	6.567	6.929	6.961		7.102	7.423	7.442	7.169	6.331			6.988	7.251	6.93	7.368	7.398
Frontal area				29.367	27.454	23.59	25.069	30.449	31.283		21.35	28.369	24.371	24.971	26.823	28.454		24.862	28.894	27.784	25.926	20.649			26.689	28.516	26.698	31.118	30.505
Pareital length				4.299	4.217	4.228	3.78	3.791	4.264		3.437	3.937	3.957	3.795	3.732	4.047		3.795	4.298	4.298	4.193	3.803			3.757	3.728	3.977	4.035	3.743
Parietal area				42.369	37.649	38.231	32.547	32.454	38.349		32.66	39.643	36.515	37.906	41.522	40.316		35.924	43.559	43.545	40.761	33.034			34.438	32.703	35.165	36.662	35.693
Effective mandible length				11.553	11.805	11.715	11.676	11.967	12		11.742	11.94	11.796	11.727	10.992	11.994		11.841	11.691	12.027	12.114	11.844			11.604	11.538	11.373	11.265	11.247
mandible axis				2.763	2.721	2.889	2.928	2.502	2.79		2.457	2.691	2.211	2.247	2.247	2.208		3.036	2.64	2.58	2.475	2.514			2.028	2.202	2.151	2.163	2.244
Inferior incisor axis				3.36	3.48	3.705	3.747	3.879	4.185		3.954	3.951	3.411	3.765	3.552	3.777		4.632	4.398	4.011	4.428	4.254			3.759	3.828	3.696	3.768	3.672
Anterior mandible height				2.574	2.7	2.493	2.667	2.511	2.613		2.211	2.205	2.268	2.259	2.637	2.214		2.415	2.421	2.358	2.43	2.34			2.508	2.439	2.34	2.358	2.241
Candilar axis				6.993	6.699	5.913	6.072	5.94	6.246		5.898	5.67	5.796	6.054	5.718	5.922		5.796	5.691	5.814	5.892	5.655			5.799	5.901	5.676	5.421	5.703
Posterior mandible height				3.951	3.357	3.429	3.915	3.3369	3.504		3.87	3.042	3.3444	3.627	3.546	3.336		4.611	3.897	3.624	3.831	3.954			3.492	3.189	3.273	3.075	3.141
